# Supplementary material for: Cytological and Molecular Characterization for Ploidy Determination in Yams (Dioscorea spp.)
Source: MDPI journal article supplement (doi:10.3390/agronomy11101897), 2021-09-22
Supplement: s1 [file s1]

**Table S1.** Relative nuclear DNA content, chromosome counts, and ploidy level determined based on DArTseq genotyping data on 236 accessions representing eight *Dioscorea* spp. and their geographical origin.

| S. No. | Accession             | Species             | Origin        | Flow Cytometry          |                          |      | Chromosome No. | DArTseq-Based Ploidy |
|--------|-----------------------|---------------------|---------------|-------------------------|--------------------------|------|----------------|----------------------|
|        |                       |                     |               | G1 Peak Position of Yam | G1 Peak Position of CRBC | PR   |                |                      |
| 1      | TDr-1489              | <i>D. rotundata</i> | Togo          | 71.02                   | 93.85                    | 0.76 | 40             | 2X                   |
| 2      | TDr-1495              | <i>D. rotundata</i> | Togo          | 70.30                   | 98.21                    | 0.72 | 40             | 2X                   |
| 3      | TDr-1499              | <i>D. rotundata</i> | Togo          | 73.18                   | 101.38                   | 0.72 | 40             | 2X                   |
| 4      | TDr-1500              | <i>D. rotundata</i> | Togo          | 100.00                  | 100.00                   | 1.00 | 60             | 3X                   |
| 5      | TDr-1509              | <i>D. rotundata</i> | Togo          | 71.51                   | 101.92                   | 0.70 | 40             | 2X                   |
| 6      | TDr-1510              | <i>D. rotundata</i> | Togo          | 71.81                   | 97.15                    | 0.74 | 40             | 2X                   |
| 7      | TDr-1513              | <i>D. rotundata</i> | Togo          | 73.00                   | 101.99                   | 0.72 | 40             | 2X                   |
| 8      | TDr-1536              | <i>D. rotundata</i> | Togo          | 73.64                   | 99.76                    | 0.74 | 40             | 2X                   |
| 9      | TDr-1559              | <i>D. rotundata</i> | Togo          | 71.65                   | 100.64                   | 0.71 | 40             | 2X                   |
| 10     | TDr-1562              | <i>D. rotundata</i> | Togo          | 72.65                   | 103.33                   | 0.70 | 40             | 2X                   |
| 11     | TDr-1568              | <i>D. rotundata</i> | Togo          | 70.99                   | 99.86                    | 0.71 | 40             | 2X                   |
| 12     | TDr-1569              | <i>D. rotundata</i> | Togo          | 73.21                   | 103.07                   | 0.71 | 40             | 2X                   |
| 13     | TDr-1585 <sup>b</sup> | <i>D. rotundata</i> | Togo          | 55.94                   | 105.02                   | 0.53 | 40             | 2X                   |
| 14     | TDr-1598              | <i>D. rotundata</i> | Togo          | 100.00                  | 100.00                   | 1.00 | 60             | 3X                   |
| 15     | TDr-1601              | <i>D. rotundata</i> | Togo          | 73.84                   | 104.13                   | 0.71 | 40             | 2X                   |
| 16     | TDr-1622              | <i>D. rotundata</i> | Togo          | 69.99                   | 97.95                    | 0.71 | 40             | 2X                   |
| 17     | TDr-1628              | <i>D. rotundata</i> | Togo          | 72.21                   | 99.49                    | 0.73 | 40             | 2X                   |
| 18     | TDr-1631              | <i>D. rotundata</i> | Togo          | 73.62                   | 10.53                    | 0.72 | 40             | 2X                   |
| 19     | TDr-1655              | <i>D. rotundata</i> | Togo          | 69.62                   | 95.95                    | 0.73 | 40             | 2X                   |
| 20     | TDr-1657              | <i>D. rotundata</i> | Togo          | 70.72                   | 98.48                    | 0.72 | 40             | 2X                   |
| 21     | TDr-1663              | <i>D. rotundata</i> | Togo          | 73.98                   | 103.51                   | 0.71 | 40             | 2X                   |
| 22     | TDr-1669              | <i>D. rotundata</i> | Togo          | 71.76                   | 100.60                   | 0.71 | 40             | 2X                   |
| 23     | TDr-1672              | <i>D. rotundata</i> | Togo          | 75.15                   | 100.92                   | 0.74 | 40             | 2X                   |
| 24     | TDr-1676              | <i>D. rotundata</i> | Togo          | 73.67                   | 99.67                    | 0.74 | 40             | 2X                   |
| 25     | TDr-1684              | <i>D. rotundata</i> | Togo          | 71.98                   | 102.23                   | 0.70 | 40             | 2X                   |
| 26     | TDr-1686              | <i>D. rotundata</i> | Togo          | 72.48                   | 101.91                   | 0.71 | 40             | 2X                   |
| 27     | TDr-1688              | <i>D. rotundata</i> | Togo          | 71.20                   | 101.00                   | 0.70 | 40             | 2X                   |
| 28     | TDr-1707              | <i>D. rotundata</i> | Togo          | 69.87                   | 97.13                    | 0.72 | 40             | 2X                   |
| 29     | TDr-1709              | <i>D. rotundata</i> | Togo          | 71.74                   | 99.47                    | 0.72 | 40             | 2X                   |
| 30     | TDr-1711              | <i>D. rotundata</i> | Togo          | 74.52                   | 102.45                   | 0.73 | 40             | 2X                   |
| 31     | TDr-1723 <sup>a</sup> | <i>D. rotundata</i> | Togo          | 100.00                  | 100.00                   | 1.00 | 40             | 2X                   |
| 32     | TDr-1734              | <i>D. rotundata</i> | Togo          | 73.74                   | 100.64                   | 0.73 | 40             | 2X                   |
| 33     | TDr-1760              | <i>D. rotundata</i> | Togo          | 71.76                   | 97.69                    | 0.73 | 40             | 2X                   |
| 34     | TDr-1762              | <i>D. rotundata</i> | Togo          | 71.00                   | 99.75                    | 0.71 | 40             | 2X                   |
| 35     | TDr-1764              | <i>D. rotundata</i> | Togo          | 71.04                   | 94.92                    | 0.75 | 40             | 2X                   |
| 36     | TDr-1765              | <i>D. rotundata</i> | Togo          | 72.67                   | 101.11                   | 0.72 | 40             | 2X                   |
| 37     | TDr-1769              | <i>D. rotundata</i> | Togo          | 71.31                   | 100.00                   | 0.71 | 40             | 2X                   |
| 38     | TDr-1772              | <i>D. rotundata</i> | Togo          | 72.59                   | 102.00                   | 0.71 | 40             | 2X                   |
| 39     | TDr-1775              | <i>D. rotundata</i> | Togo          | 100.00                  | 100.00                   | 1.00 | 60             | 3X                   |
| 40     | TDr-1799              | <i>D. rotundata</i> | Togo          | 72.75                   | 99.97                    | 0.73 | 40             | 2X                   |
| 41     | TDr-1813              | <i>D. rotundata</i> | Togo          | 70.04                   | 99.15                    | 0.71 | 40             | 2X                   |
| 42     | TDr-1818              | <i>D. rotundata</i> | Togo          | 68.97                   | 98.31                    | 0.70 | 40             | 2X                   |
| 43     | TDr-1825              | <i>D. rotundata</i> | Togo          | 58.50                   | 101.39                   | 0.58 | 40             | 2X                   |
| 44     | TDr-1828              | <i>D. rotundata</i> | Togo          | 68.51                   | 96.61                    | 0.71 | 40             | 2X                   |
| 45     | TDr-1829              | <i>D. rotundata</i> | Togo          | 72.17                   | 98.86                    | 0.73 | 40             | 2X                   |
| 46     | TDr-1839              | <i>D. rotundata</i> | Togo          | 73.69                   | 103.38                   | 0.71 | 40             | 2X                   |
| 47     | TDr-1852              | <i>D. rotundata</i> | Togo          | 100.00                  | 100.00                   | 1.00 | 60             | 3X                   |
| 48     | TDr-1858              | <i>D. rotundata</i> | Togo          | 72.03                   | 99.21                    | 0.73 | 40             | 2X                   |
| 49     | TDr-1881              | <i>D. rotundata</i> | Ghana         | 72.13                   | 101.14                   | 0.71 | 40             | 2X                   |
| 50     | TDr-1888              | <i>D. rotundata</i> | Cote d'Ivoire | 70.33                   | 99.22                    | 0.71 | 40             | 2X                   |

|     |                       |                     |               |        |        |      |         |    |
|-----|-----------------------|---------------------|---------------|--------|--------|------|---------|----|
| 51  | TDr-1905              | <i>D. rotundata</i> | Ghana         | 75.44  | 102.70 | 0.73 | 40      | 2X |
| 52  | TDr-1907              | <i>D. rotundata</i> | Togo          | 71.63  | 101.96 | 0.70 | 40      | 2X |
| 53  | TDr-1913              | <i>D. rotundata</i> | Cote d'Ivoire | 72.66  | 103.96 | 0.70 | 40      | 2X |
| 54  | TDr-1922 <sup>b</sup> | <i>D. rotundata</i> | Cote d'Ivoire | 70.96  | 97.44  | 0.73 | 60      | 3X |
| 55  | TDr-1937              | <i>D. rotundata</i> | Benin         | 72.26  | 101.72 | 0.71 | 40      | 2X |
| 56  | TDr-1939              | <i>D. rotundata</i> | Togo          | 70.40  | 100.35 | 0.70 | 40      | 2X |
| 57  | TDr-1943              | <i>D. rotundata</i> | Benin         | 71.20  | 100.38 | 0.71 | 40      | 2X |
| 58  | TDr-1949              | <i>D. rotundata</i> | Ghana         | 72.32  | 101.50 | 0.71 | 40      | 2X |
| 59  | TDr-1953              | <i>D. rotundata</i> | Ghana         | 71.71  | 98.03  | 0.73 | 40      | 2X |
| 60  | TDr-1956              | <i>D. rotundata</i> | Cote d'Ivoire | 71.19  | 98.85  | 0.72 | 40      | 2X |
| 61  | TDr-1966              | <i>D. rotundata</i> | Ghana         | 74.33  | 102.45 | 0.73 | 40      | 2X |
| 62  | TDr-2000              | <i>D. rotundata</i> | Cote d'Ivoire | 69.42  | 99.50  | 0.70 | 40      | 2X |
| 63  | TDr-2009              | <i>D. rotundata</i> | Cote d'Ivoire | 67.95  | 95.58  | 0.71 | 40      | 2X |
| 64  | TDr-2015              | <i>D. rotundata</i> | Togo          | 100.00 | 100.00 | 1.00 | 60      | 3X |
| 65  | TDr-2017              | <i>D. rotundata</i> | Cote d'Ivoire | 70.35  | 100.85 | 0.70 | 40      | 2X |
| 66  | TDr-2018              | <i>D. rotundata</i> | Cote d'Ivoire | 72.73  | 102.46 | 0.71 | 40      | 2X |
| 67  | TDr-2028              | <i>D. rotundata</i> | Togo          | 100.00 | 100.00 | 1.00 | 60      | 3X |
| 68  | TDr-2033              | <i>D. rotundata</i> | Nigeria       | 62.78  | 94.42  | 0.66 | 40      | 2X |
| 69  | TDr-2034              | <i>D. rotundata</i> | Nigeria       | 100.00 | 100.00 | 1.00 | 60      | 3X |
| 70  | TDr-2040              | <i>D. rotundata</i> | Nigeria       | 73.14  | 100.47 | 0.73 | 40      | 2X |
| 71  | TDr-2050              | <i>D. rotundata</i> | Nigeria       | 100.00 | 100.00 | 1.00 | 60      | 3X |
| 72  | TDr-2071              | <i>D. rotundata</i> | Nigeria       | 100.00 | 100.00 | 1.00 | 60      | 3X |
| 73  | TDr-2084              | <i>D. rotundata</i> | Nigeria       | 72.50  | 100.75 | 0.72 | 40      | 2X |
| 74  | TDr-2126              | <i>D. rotundata</i> | Nigeria       | 75.38  | 104.00 | 0.72 | 40      | 2X |
| 75  | TDr-2167              | <i>D. rotundata</i> | Nigeria       | 100.00 | 100.00 | 1.00 | 60      | 3X |
| 76  | TDr-2266              | <i>D. rotundata</i> | Nigeria       | 73.01  | 99.40  | 0.74 | 40      | 2X |
| 77  | TDr-2269              | <i>D. rotundata</i> | Nigeria       | 69.83  | 99.94  | 0.70 | 40      | 2X |
| 78  | TDr-2291              | <i>D. rotundata</i> | Nigeria       | 70.64  | 97.27  | 0.73 | 40      | 2X |
| 79  | TDr-2348              | <i>D. rotundata</i> | Nigeria       | 71.49  | 98.96  | 0.72 | 40      | 2X |
| 80  | TDr-2363              | <i>D. rotundata</i> | Nigeria       | 73.44  | 103.40 | 0.71 | 40      | 2X |
| 81  | TDr-2439              | <i>D. rotundata</i> | Nigeria       | 71.47  | 99.02  | 0.72 | 40      | 2X |
| 82  | TDr-2564              | <i>D. rotundata</i> | Nigeria       | 64.58  | 86.43  | 0.75 | 40      | 2X |
| 83  | TDr-2572              | <i>D. rotundata</i> | Nigeria       | 71.28  | 100.18 | 0.71 | 40      | 2X |
| 84  | TDr-2575              | <i>D. rotundata</i> | Nigeria       | 69.27  | 98.29  | 0.70 | 40      | 2X |
| 85  | TDr-2582              | <i>D. rotundata</i> | Nigeria       | 74.30  | 103.42 | 0.72 | 40      | 2X |
| 86  | TDr-2664              | <i>D. rotundata</i> | Nigeria       | 100.00 | 100.00 | 1.00 | 60      | 3X |
| 87  | TDr-2678              | <i>D. rotundata</i> | Nigeria       | 70.11  | 101.98 | 0.70 | unknown | 2X |
| 88  | TDr-2688              | <i>D. rotundata</i> | Nigeria       | 100.00 | 100.00 | 1.00 | 60      | 3X |
| 89  | TDr-2701              | <i>D. rotundata</i> | Nigeria       | 73.62  | 103.49 | 0.71 | 40      | 2X |
| 90  | TDr-2763              | <i>D. rotundata</i> | Nigeria       | 69.46  | 96.55  | 0.72 | 40      | 2X |
| 91  | TDr-2916              | <i>D. rotundata</i> | Nigeria       | 71.50  | 97.94  | 0.73 | 40      | 2X |
| 92  | TDr-2946              | <i>D. rotundata</i> | Nigeria       | 52.22  | 80.22  | 0.65 | 40      | 2X |
| 93  | TDr-2968              | <i>D. rotundata</i> | Nigeria       | 73.64  | 102.32 | 0.72 | 40      | 2X |
| 94  | TDr-2974              | <i>D. rotundata</i> | Nigeria       | 100.00 | 100.00 | 1.00 | 60      | 3X |
| 95  | TDr-3287              | <i>D. rotundata</i> | Nigeria       | 70.96  | 97.33  | 0.73 | 40      | 2X |
| 96  | TDr-3296              | <i>D. rotundata</i> | Nigeria       | 69.37  | 97.27  | 0.71 | 40      | 2X |
| 97  | TDr-3310              | <i>D. rotundata</i> | Nigeria       | 72.09  | 101.27 | 0.71 | 40      | 2X |
| 98  | TDr-3320              | <i>D. rotundata</i> | Nigeria       | 72.82  | 100.13 | 0.73 | 40      | 2X |
| 99  | TDr-3374              | <i>D. rotundata</i> | Nigeria       | 71.03  | 100.20 | 0.71 | 40      | 2X |
| 100 | TDr-3402              | <i>D. rotundata</i> | Nigeria       | 72.61  | 100.82 | 0.72 | 40      | 2X |
| 101 | TDr-3430              | <i>D. rotundata</i> | Nigeria       | 70.98  | 100.31 | 0.71 | 40      | 2X |
| 102 | TDr-3466              | <i>D. rotundata</i> | Nigeria       | 70.40  | 97.94  | 0.73 | 40      | 2X |
| 103 | TDr-3472              | <i>D. rotundata</i> | Nigeria       | 70.17  | 98.19  | 0.71 | 40      | 2X |
| 104 | TDr-3497              | <i>D. rotundata</i> | Nigeria       | 73.99  | 104.74 | 0.71 | 40      | 2X |
| 105 | TDr-3519              | <i>D. rotundata</i> | Nigeria       | 100.00 | 100.00 | 1.00 | 60      | 3X |
| 106 | TDr-3524              | <i>D. rotundata</i> | Nigeria       | 73.06  | 101.76 | 0.72 | 40      | 2X |

|     |                       |                     |               |        |        |      |         |    |
|-----|-----------------------|---------------------|---------------|--------|--------|------|---------|----|
| 107 | TDr-3551              | <i>D. rotundata</i> | Nigeria       | 72.48  | 101.15 | 0.72 | 40      | 2X |
| 108 | TDr-3567              | <i>D. rotundata</i> | Nigeria       | 71.08  | 97.74  | 0.73 | 40      | 2X |
| 109 | TDr-3592              | <i>D. rotundata</i> | Nigeria       | 100.00 | 100.00 | 1.00 | 60      | 3X |
| 110 | TDr-3643              | <i>D. rotundata</i> | Nigeria       | 69.12  | 95.75  | 0.72 | 40      | 2X |
| 111 | TDr-3671 <sup>a</sup> | <i>D. rotundata</i> | Nigeria       | 100.00 | 100.00 | 1.00 | 40      | 2X |
| 112 | TDr-3719              | <i>D. rotundata</i> | Nigeria       | 67.78  | 90.96  | 0.75 | 40      | 2X |
| 113 | TDr-3721              | <i>D. rotundata</i> | Nigeria       | 72.61  | 100.19 | 0.72 | 40      | 2X |
| 114 | TDr-3870              | <i>D. rotundata</i> | Nigeria       | 74.76  | 104.00 | 0.72 | 40      | 2X |
| 115 | TDr-3882              | <i>D. rotundata</i> | Nigeria       | 71.99  | 101.64 | 0.71 | 40      | 2X |
| 116 | TDr-4084              | <i>D. rotundata</i> | Nigeria       | 70.79  | 98.70  | 0.72 | 40      | 2X |
| 117 | TDr-4307              | <i>D. rotundata</i> | Nigeria       | 76.38  | 103.77 | 0.74 | 40      | 2X |
| 118 | TDr-4379              | <i>D. rotundata</i> | Nigeria       | 73.77  | 103.61 | 0.71 | 40      | 2X |
| 119 | TDr-89/02665          | <i>D. rotundata</i> | Unknown       | 68.10  | 95.55  | 0.71 | 40      | 2X |
|     |                       |                     |               |        |        |      |         |    |
| 1   | TDa-1001              | <i>D. alata</i>     | Togo          | 58.06  | 100.60 | 0.58 | 40      | 2X |
| 2   | TDa-1008              | <i>D. alata</i>     | Togo          | 86.92  | 98.95  | 0.88 | 60      | 3X |
| 3   | TDa-1009              | <i>D. alata</i>     | Togo          | 52.06  | 95.46  | 0.55 | 40      | 2X |
| 4   | TDa-1010              | <i>D. alata</i>     | Togo          | 36.83  | 89.96  | 0.41 | 40      | 2X |
| 5   | TDa-1014 <sup>a</sup> | <i>D. alata</i>     | Togo          | 100.00 | 100.00 | 1.00 | unknown | 2X |
| 6   | TDa-1017              | <i>D. alata</i>     | Togo          | 56.70  | 98.40  | 0.58 | 40      | 2X |
| 7   | TDa-1020              | <i>D. alata</i>     | Togo          | 68.85  | 83.00  | 0.83 | 60      | 3X |
| 8   | TDa-1027              | <i>D. alata</i>     | Togo          | 56.57  | 95.56  | 0.59 | 40      | 2X |
| 9   | TDa-1030              | <i>D. alata</i>     | Togo          | 85.00  | 98.00  | 0.87 | 60      | 3X |
| 10  | TDa-1033              | <i>D. alata</i>     | Togo          | 58.02  | 100.41 | 0.60 | 40      | 2X |
| 11  | TDa-1036              | <i>D. alata</i>     | Togo          | 112.69 | 98.06  | 1.15 | 80      | 4X |
| 12  | TDa-1043              | <i>D. alata</i>     | Togo          | 54.02  | 93.62  | 0.58 | 40      | 2X |
| 13  | TDa-1056              | <i>D. alata</i>     | Togo          | 52.87  | 97.67  | 0.54 | 40      | 2X |
| 14  | TDa-1062              | <i>D. alata</i>     | Togo          | 82.92  | 100.73 | 0.82 | 60      | 3X |
| 15  | TDa-1063              | <i>D. alata</i>     | Togo          | 57.86  | 100.01 | 0.58 | 40      | 2X |
| 16  | TDa-1066              | <i>D. alata</i>     | Togo          | 54.82  | 94.71  | 0.58 | 40      | 2X |
| 17  | TDa-1078              | <i>D. alata</i>     | Togo          | 58.92  | 100.33 | 0.59 | 40      | 2X |
| 18  | TDa-1079 <sup>b</sup> | <i>D. alata</i>     | Togo          | 41.96  | 82.84  | 0.51 | 40      | 2X |
| 19  | TDa-1083 <sup>b</sup> | <i>D. alata</i>     | Togo          | 52.69  | 99.61  | 0.53 | 40      | 2X |
| 20  | TDa-1085              | <i>D. alata</i>     | Togo          | 56.85  | 101.90 | 0.56 | 40      | 2X |
| 21  | TDa-1092              | <i>D. alata</i>     | Togo          | 56.92  | 98.08  | 0.58 | 40      | 2X |
| 22  | TDa-1096              | <i>D. alata</i>     | Togo          | 57.42  | 99.53  | 0.58 | 40      | 2X |
| 23  | TDa-11/00010          | <i>D. alata</i>     | Unknown       | 58.08  | 101.74 | 0.57 | 40      | 2X |
| 24  | TDa-1104              | <i>D. alata</i>     | Togo          | 112.01 | 99.01  | 1.13 | 80      | 4X |
| 25  | TDa-1122              | <i>D. alata</i>     | Togo          | 60.12  | 99.94  | 0.60 | 40      | 2X |
| 26  | TDa-1124              | <i>D. alata</i>     | Togo          | 85.03  | 99.89  | 0.85 | 60      | 3X |
| 27  | TDa-1125              | <i>D. alata</i>     | Togo          | 55.15  | 96.88  | 0.57 | 40      | 2X |
| 28  | TDa-1137              | <i>D. alata</i>     | Togo          | 118.12 | 99.23  | 1.19 | 80      | 4X |
| 29  | TDa-1142              | <i>D. alata</i>     | Togo          | 56.60  | 97.01  | 0.58 | 40      | 2X |
| 30  | TDa-1143              | <i>D. alata</i>     | Togo          | 50.74  | 88.40  | 0.57 | 40      | 2X |
| 31  | TDa-1145 <sup>b</sup> | <i>D. alata</i>     | Togo          | 51.20  | 99.26  | 0.52 | 40      | 2X |
| 32  | TDa-1167              | <i>D. alata</i>     | Benin         | 59.54  | 99.54  | 0.60 | 40      | 2X |
| 33  | TDa-1176              | <i>D. alata</i>     | Benin         | 59.63  | 102.41 | 0.58 | 40      | 2X |
| 34  | TDa-1177 <sup>a</sup> | <i>D. alata</i>     | Benin         | 87.24  | 98.69  | 0.88 | 40      | 2X |
| 35  | TDa-1187 <sup>b</sup> | <i>D. alata</i>     | Benin         | 95.65  | 196.90 | 0.49 | 40      | 2X |
| 36  | TDa-1189 <sup>a</sup> | <i>D. alata</i>     | Benin         | 50.01  | 97.06  | 0.51 | 80      | 4X |
| 37  | TDa-1196              | <i>D. alata</i>     | Cote d'Ivoire | 62.75  | 102.24 | 0.61 | 40      | 2X |
| 38  | TDa-1207              | <i>D. alata</i>     | Togo          | 56.47  | 93.99  | 0.60 | 40      | 2X |
| 39  | TDa-1217 <sup>b</sup> | <i>D. alata</i>     | Togo          | 47.48  | 96.25  | 0.49 | 40      | 2X |
| 40  | TDa-1221              | <i>D. alata</i>     | Cote d'Ivoire | 59.65  | 101.62 | 0.59 | 40      | 2X |
| 41  | TDa-1236              | <i>D. alata</i>     | Togo          | 57.28  | 100.92 | 0.57 | 40      | 2X |
| 42  | TDa-1240 <sup>b</sup> | <i>D. alata</i>     | Benin         | 48.39  | 95.65  | 0.51 | 40      | 2X |

|    |                         |                      |               |        |        |      |    |    |
|----|-------------------------|----------------------|---------------|--------|--------|------|----|----|
| 43 | TDa-1244                | <i>D. alata</i>      | Togo          | 60.20  | 105.19 | 0.57 | 40 | 2X |
| 44 | TDa-1253                | <i>D. alata</i>      | Cote d'Ivoire | 57.79  | 101.79 | 0.57 | 40 | 2X |
| 45 | TDa-1258                | <i>D. alata</i>      | Benin         | 54.70  | 97.93  | 0.56 | 40 | 2X |
| 46 | TDa-1270                | <i>D. alata</i>      | Togo          | 57.15  | 95.91  | 0.60 | 40 | 2X |
| 47 | TDa-1277 <sup>b</sup>   | <i>D. alata</i>      | Benin         | 52.78  | 106.31 | 0.50 | 40 | 2X |
| 48 | TDa-1282                | <i>D. alata</i>      | Togo          | 79.27  | 99.30  | 0.80 | 60 | 3X |
| 49 | TDa-1285                | <i>D. alata</i>      | Nigeria       | 112.98 | 99.57  | 1.13 | 80 | 4X |
| 50 | TDa-1287                | <i>D. alata</i>      | Nigeria       | 56.60  | 93.40  | 0.61 | 40 | 2X |
| 51 | TDa-1290                | <i>D. alata</i>      | Togo          | 57.71  | 99.00  | 0.58 | 40 | 2X |
| 52 | TDa-1299                | <i>D. alata</i>      | Togo          | 58.21  | 99.10  | 0.59 | 40 | 2X |
| 53 | TDa-1315                | <i>D. alata</i>      | Nigeria       | 58.23  | 100.80 | 0.58 | 40 | 2X |
| 54 | TDa-1316                | <i>D. alata</i>      | Ghana         | 48.91  | 88.66  | 0.55 | 40 | 2X |
| 55 | TDa-1319 <sup>b</sup>   | <i>D. alata</i>      | Nigeria       | 100.00 | 100.00 | 1.00 | 80 | 4X |
| 56 | TDa-1328                | <i>D. alata</i>      | Ghana         | 56.14  | 99.01  | 0.57 | 40 | 2X |
| 57 | TDa-1347                | <i>D. alata</i>      | Nigeria       | 58.21  | 98.32  | 0.59 | 40 | 2X |
| 58 | TDa-1351                | <i>D. alata</i>      | Nigeria       | 86.44  | 99.40  | 0.87 | 60 | 3X |
| 59 | TDa-1359                | <i>D. alata</i>      | Togo          | 32.79  | 69.26  | 0.47 | 40 | 2X |
| 60 | TDa-1361                | <i>D. alata</i>      | Ghana         | 109.87 | 95.79  | 1.15 | 80 | 4X |
| 61 | TDa-1365                | <i>D. alata</i>      | Togo          | 59.01  | 101.14 | 0.58 | 40 | 2X |
| 62 | TDa-1375                | <i>D. alata</i>      | Togo          | 53.08  | 93.83  | 0.57 | 40 | 2X |
| 63 | TDa-1404                | <i>D. alata</i>      | Nigeria       | 56.99  | 99.19  | 0.57 | 40 | 2X |
| 64 | TDa-1425                | <i>D. alata</i>      | Nigeria       | 84.36  | 99.15  | 0.85 | 60 | 3X |
| 65 | TDa-1432                | <i>D. alata</i>      | Nigeria       | 57.73  | 98.95  | 0.58 | 40 | 2X |
| 66 | TDa-1439 <sup>b</sup>   | <i>D. alata</i>      | Ghana         | 50.49  | 100.83 | 0.50 | 40 | 2X |
| 67 | TDa-1448                | <i>D. alata</i>      | Nigeria       | 57.93  | 101.34 | 0.57 | 40 | 2X |
| 68 | TDa-1449                | <i>D. alata</i>      | Ghana         | 84.04  | 98.59  | 0.85 | 60 | 3X |
| 69 | TDa-1459                | <i>D. alata</i>      | Togo          | 54.82  | 91.47  | 0.60 | 40 | 2X |
| 70 | TDa-1471 <sup>b</sup>   | <i>D. alata</i>      | Ghana         | 40.90  | 85.18  | 0.48 | 40 | 2X |
| 71 | TDa-2861 <sup>b</sup>   | <i>D. alata</i>      | Cote d'Ivoire | 48.81  | 98.21  | 0.50 | 40 | 2X |
| 72 | TDa-3236                | <i>D. alata</i>      | Togo          | 81.68  | 95.61  | 0.85 | 60 | 3X |
| 73 | TDa-3271 <sup>b</sup>   | <i>D. alata</i>      | Ghana         | 46.45  | 90.45  | 0.51 | 40 | 2X |
| 74 | TDa-3902                | <i>D. alata</i>      | Benin         | 57.41  | 96.78  | 0.59 | 40 | 2X |
| 75 | TDa-3903                | <i>D. alata</i>      | Benin         | 84.60  | 97.18  | 0.87 | 60 | 3X |
| 76 | TDa-3914                | <i>D. alata</i>      | Nigeria       | 57.66  | 97.32  | 0.59 | 40 | 2X |
| 77 | TDa-3918                | <i>D. alata</i>      | Benin         | 57.92  | 97.25  | 0.60 | 40 | 2X |
| 78 | TDa-4042                | <i>D. alata</i>      | Nigeria       | 56.48  | 98.06  | 0.58 | 40 | 2X |
| 79 | TDa-4326                | <i>D. alata</i>      | Benin         | 44.67  | 91.26  | 0.49 | 40 | 2X |
| 80 | TDa-4335 <sup>b</sup>   | <i>D. alata</i>      | Benin         | 51.75  | 97.37  | 0.53 | 40 | 2X |
| 81 | TDa-4346 <sup>b</sup>   | <i>D. alata</i>      | Benin         | 51.13  | 101.87 | 0.50 | 40 | 2X |
| 82 | TDa-4635                | <i>D. alata</i>      | Togo          | 58.50  | 105.24 | 0.56 | 40 | 2X |
|    |                         |                      |               |        |        |      |    |    |
| 1  | TDc-2808                | <i>D. cayenensis</i> | Cote d'Ivoire | 100.00 | 100.00 | 1.00 | 60 | 3X |
| 2  | TDc-3897                | <i>D. cayenensis</i> | Benin         | 100.00 | 100.00 | 1.00 | 60 | 3X |
| 3  | TDc-2798                | <i>D. cayenensis</i> | Togo          | 133.76 | 97.10  | 1.38 | 80 | 4X |
| 4  | TDc-2816                | <i>D. cayenensis</i> | Nigeria       | 135.75 | 101.70 | 1.33 | 80 | 4X |
|    |                         |                      |               |        |        |      |    |    |
| 1  | TDd-3909                | <i>D. dumetorum</i>  | Nigeria       | 35.68  | 106.91 | 0.33 | 40 | 2X |
| 2  | TDd-3100                | <i>D. dumetorum</i>  | Togo          | 51.15  | 102.98 | 0.50 | 60 | 3X |
| 3  | TDd-3778                | <i>D. dumetorum</i>  | Nigeria       | 52.58  | 103.16 | 0.51 | 60 | 3X |
| 4  | TDd-3806                | <i>D. dumetorum</i>  | Nigeria       | 50.54  | 99.66  | 0.51 | 60 | 3X |
| 5  | TDd-3947                | <i>D. dumetorum</i>  | Nigeria       | 51.08  | 102.12 | 0.50 | 60 | 3X |
| 6  | TDd-4118                | <i>D. dumetorum</i>  | Togo          | 53.57  | 108.27 | 0.49 | 60 | 3X |
|    |                         |                      |               |        |        |      |    |    |
| 1  | TDdes-2786              | <i>D. esculenta</i>  | Nigeria       | 117.65 | 100.71 | 1.17 | 80 | 4X |
| 2  | TDdes-3034              | <i>D. esculenta</i>  | Togo          | 116.70 | 100.34 | 1.16 | 80 | 4X |
| 3  | TDdes-3038 <sup>b</sup> | <i>D. esculenta</i>  | Togo          | 100.00 | 100.00 | 1.00 | 80 | 4X |

[illegible]
